# Supplementary material for: A three-dimensional supramolecular network structure through hydrogen bonding and π–π interaction: synthesis, structure, and the fluorescence detection of balsalazide disodium
Source: Royal Society of Chemistry journal article supplement (doi:10.1039/d1ce00373a), 2021-01-01
Supplement: d1ce00373a1.pdf [file d1ce00373a1.pdf]

**Three-dimensional supramolecular network structure  
cooperative hydrogen bond and  $\pi$ - $\pi$  interaction:  
synthesis, structure, and the fluorescence detection of  
balsalazide disodium**

Chen Wang<sup>a</sup>, Zi Xin You<sup>a</sup>, Yong-Heng Xing<sup>a\*</sup>, Feng-Ying Bai<sup>a</sup>, Zhan Shi<sup>b</sup>

<sup>a</sup> *College of Chemistry and Chemical Engineering, Liaoning Normal University, Huanghe Road 850#, Dalian 116029, P. R. China*

<sup>b</sup> *State Key Laboratory of Inorganic Synthesis and Preparative Chemistry, College of Chemistry, Jilin University, Changchun 130012, P. R. China*

E-mail: [xingyongheng2000@163.com](mailto:xingyongheng2000@163.com) (Yong-Heng Xing);

**Materials and methods:** The elemental analyses were carried out on a Perkin-Elmer 240C automatic analyzer. Infrared spectra were measured on a Bruker AXSTENSOR-27 FT-IR spectrometer with pressed KBr pellets in the range of 400-4000  $\text{cm}^{-1}$  at room temperature. UV-vis spectra were recorded on JASCOV-570 spectrometer (200-2500 nm, in form of solid sample) and Lambda 35 UV/VIS Spectrometer (200-800 nm, in form of liquid sample). X-ray powder diffraction (XRD) data were collected on a Bruker Advance-D8 with Cu  $K\alpha$  radiation, in the range  $5^\circ <2\theta < 50^\circ$ , with a step size of  $0.02^\circ$  ( $2\theta$ ) and an acquisition time of 2 s per step. Thermogravimetric analysis (TG) was performed on a Perkin Elmer Diamond TG/DTA under the conditions of the  $\text{N}_2$  atmosphere in the temperature range from 30 to 800  $^\circ\text{C}$ . The photoluminescent spectra of the coordination polymers were measured on a HORIBA Fluoromax-4-TCSPC spectrofluorometer equipped with Spectra LED Pulsed LED sources at room temperature (200-1000 nm). The  $^1\text{H}$ -NMR spectra were measured on Nuclear Magnetic Resonance Spectrometer (Bruker Avance II 400).

**Synthesis of NDI-A:** The NDI-A was successfully composed according to the previous literature<sup>[1]</sup>. IR (KBr,  $\text{cm}^{-1}$ ): 3492, 3159, 1693, 1595, 1409, 1306, 1244, 1198, 919, 846, 751.  $^1\text{H}$  NMR (400 MHz, DMSO- $d_6$ )  $\delta$  11.93 (d,  $J = 15.9$  Hz, 2H), 8.89 (dt,  $J = 4.5$  Hz, 4H), 8.86 (d,  $J = 1.7$  Hz, 4H), 7.95 (m, 4H).

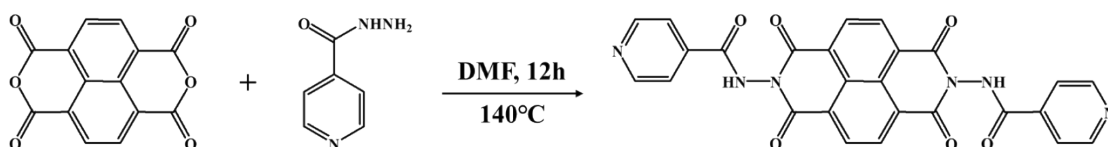

**Scheme S1:** Synthesis of ligand NDI-A

**Synthesis of  $\text{H}_3\text{TIBTC}$ :** Based on the reported literature<sup>[2]</sup>, we have improved the synthesis of  $\text{H}_3\text{TIBTC}$ . **2,4,6-triiodo-1,3,5-trimethylbenzene (M -1):** Combine 1,3,5-trimethylbenzene (M) (12.0 g), iodine (38.8 g),  $\text{HIO}_4 \cdot 2\text{H}_2\text{O}$  (14.0 g),  $\text{CH}_3\text{COOH}$  (100 mL) and deionized water (20 mL) were added to the three-necked flask. After stirring for a while, 3 mL of concentrated  $\text{H}_2\text{SO}_4$  was added dropwise. The mixture was heated to reflux at 90 °C for 10 hours, then filtered with suction and repeatedly washed with deionized water, and finally purified with acetone to obtain 2,4,6-triiodo-1,3,5-trimethylbenzene (M-1).  **$\text{H}_3\text{TIBTC}$ :** Add 5.0 g of 2,4,6-triiodo-1,3,5-trimethylbenzene, 70 mL of pyridine and 25 mL of deionized water to a three-necked flask, and stir until the solid is completely dissolved to obtain milky white liquid. The temperature was then raised to 90 °C and solid  $\text{KMnO}_4$  (10.0 g) was added every 1 hour for a total of 6 times. The mixture was heated to reflux for 10-12 hours. After the reaction was completed, it was filtered while hot, the solid in the solution was washed with 35 mL of 5% KOH solution, and then the pyridine was removed by

rotary evaporation. Then, 75 mL of distilled water was added to remove insoluble materials, and the filtrate was adjusted to pH = 1 with concentrated HCl. Finally, it was extracted with 125 mL of ethyl acetate, washed with 20 mL of water, and then rotary evaporation to give 2,4,6-triiodo-1,3,5-trimellitric acid ( $H_3TIBTC$ ) as a solid. Yield: 86%, m.p. > 280 °C. IR (KBr,  $cm^{-1}$ ): 3444, 1616, 1501, 1373, 1308, 1160.  $^1H$  NMR (M -1) (400 MHz,  $CDCl_3$ )  $\delta$  3.00 (d,  $J = 0.9$  Hz, 1H).

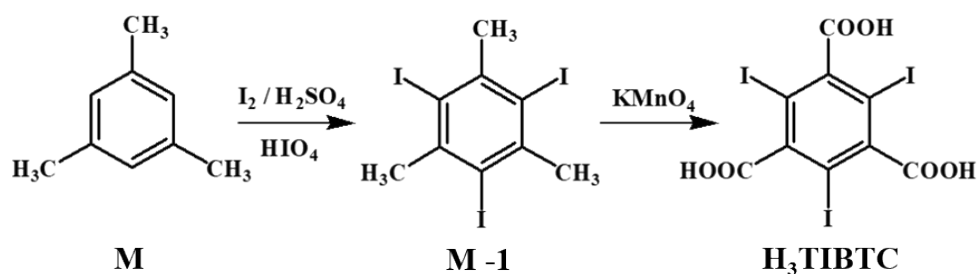

**Scheme S2:** Synthesis of ligand  $H_3TIBTC$

**Synthesis of  $H_3DIBTC$ :** The synthesis route of the  $H_3DIBTC$  was similarly to the  $H_3TIBTC$ <sup>[3]</sup>. The only difference is that the molar ratio of 1,3,5-trimethylbenzene to iodine is changed from 1:3 to 1:2.5. IR (KBr,  $cm^{-1}$ ): 3466, 1627, 1518, 1408, 1247, 1153.  $^1H$  NMR (Compound M-2) (400 MHz,  $CDCl_3$ ),  $\delta$  2.44 (s, 6H),  $\delta$  2.94 (s, 3H),  $\delta$  7.01 (s, 1H).

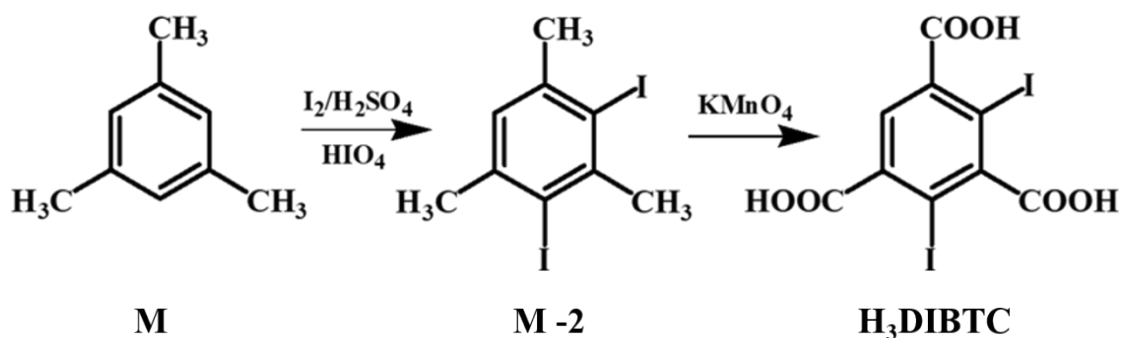

**Scheme S3:** Synthesis of ligand  $H_3DIBTC$

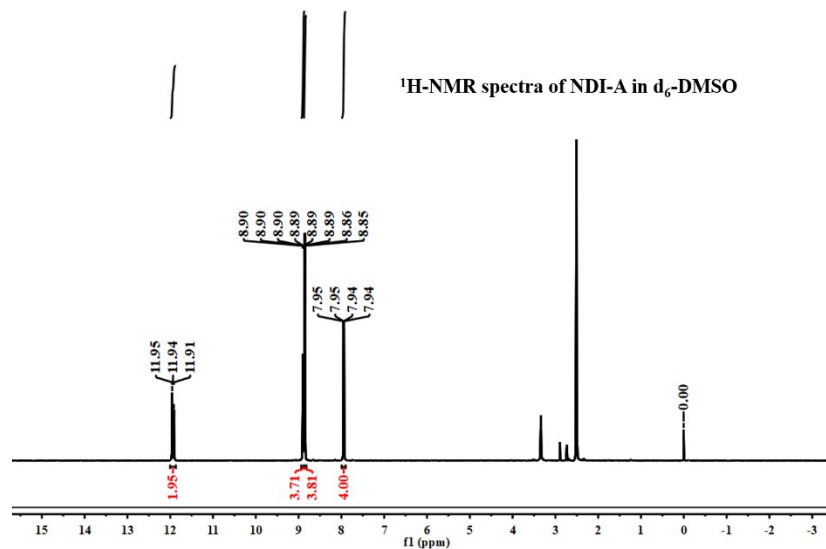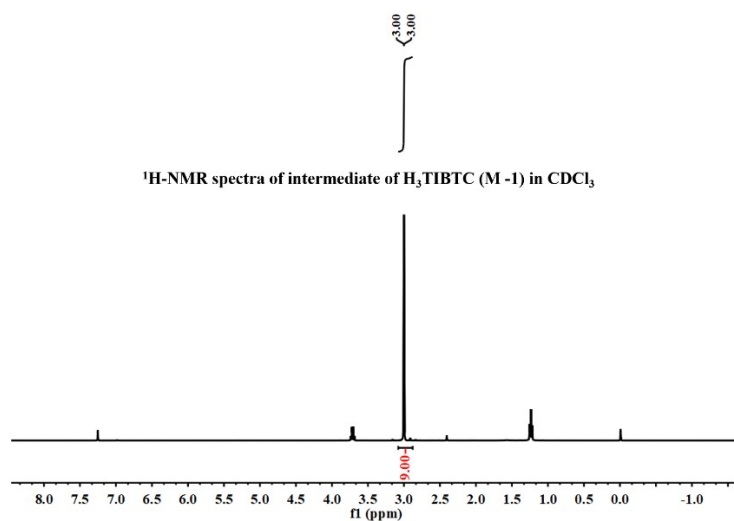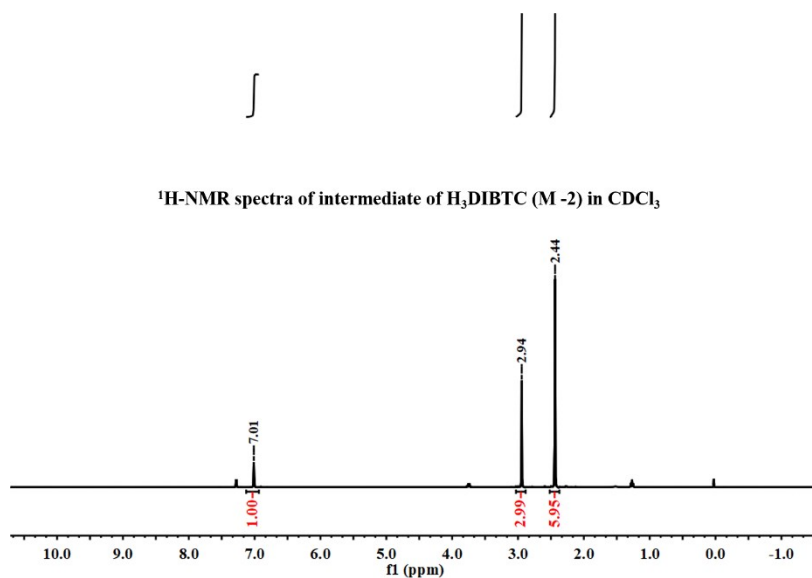

**Figure S1** The <sup>1</sup>H-NMR spectra of the ligand NDI-A, intermediate of H<sub>3</sub>TIBTC (M -1),  
intermediate of H<sub>3</sub>DIBTC (M-2)

## X-ray crystallographic determination

Suitable single crystals of three co-crystals (**1-3**) were mounted on glass fibers for X-ray structure determination. Reflection data were collected at room temperature on a Bruker AXS SMART APEX II CCD diffractometer with graphite monochromatized Mo K $\alpha$  radiation ( $\lambda = 0.71073 \text{ \AA}$ ). All absorption corrections were performed using the SADABS program<sup>[4]</sup>. All calculations were performed using the SHELX-97 program<sup>[5, 6]</sup> and OLEX-2 program<sup>[7]</sup>. Crystal structures were solved by the direct method. All non-hydrogen atoms were refined anisotropic-ally. Hydrogen atoms were fixed at calculated positions and refined by using a riding mode. Structures were checked for additional symmetry using PLATON<sup>[8]</sup>.

**Table S1.** Crystallographic data for the co-crystals **1-3**\*

| co-crystals                              | <b>1</b>                                                      | <b>2</b>                                                      | <b>3</b>                                                      |
|------------------------------------------|---------------------------------------------------------------|---------------------------------------------------------------|---------------------------------------------------------------|
| Formula                                  | C <sub>33</sub> H <sub>19</sub> N <sub>6</sub> O <sub>6</sub> | C <sub>14</sub> H <sub>7</sub> I <sub>3</sub> NO <sub>6</sub> | C <sub>14</sub> H <sub>8</sub> I <sub>2</sub> NO <sub>6</sub> |
| Molecular weight                         | 595.54                                                        | 665.91                                                        | 540.01                                                        |
| Crystal system                           | Monoclinic                                                    | Monoclinic                                                    | Monoclinic                                                    |
| Space group                              | <i>P2<sub>1</sub>/c</i>                                       | <i>P2<sub>1</sub>/n</i>                                       | <i>C2/c</i>                                                   |
| <i>a</i> /Å                              | 10.7535(7)                                                    | 8.9598(5)                                                     | 14.811(6)                                                     |
| <i>b</i> /Å                              | 8.9587(6)                                                     | 21.9155(11)                                                   | 9.023(4)                                                      |
| <i>c</i> /Å                              | 27.8995(19)                                                   | 9.5862(5)                                                     | 24.110(10)                                                    |
| $\alpha$ (°)                             | 90                                                            | 90                                                            | 90                                                            |
| $\beta$ (°)                              | 96.3210(10)                                                   | 116.7110(10)                                                  | 106.673(7)                                                    |
| $\gamma$ (°)                             | 90                                                            | 90                                                            | 90                                                            |
| <i>V</i> ( nm <sup>3</sup> )             | 2671.4(3)                                                     | 1681.46(15)                                                   | 3086(2)                                                       |
| <i>Z</i>                                 | 4                                                             | 4                                                             | 8                                                             |
| D <sub>calc</sub> /(g·cm <sup>-3</sup> ) | 1.481                                                         | 2.630                                                         | 2.324                                                         |
| F(000)                                   | 1228                                                          | 1220                                                          | 2024                                                          |
| $\mu$ (Mo K $\alpha$ )/nm                | 0.105                                                         | 5.607                                                         | 4.106                                                         |
| $\theta$ range/(°)                       | 1.469-28.292                                                  | 1.858-31.113                                                  | 2.675-28.609                                                  |

|                                                             |                              |                              |                             |
|-------------------------------------------------------------|------------------------------|------------------------------|-----------------------------|
| Reflections collected                                       | 16538                        | 11463                        | 9783                        |
| Independent reflections [ $I > 2\sigma(I)$ ]                | 6468                         | 4822                         | 3827                        |
| Parameters                                                  | 406                          | 218                          | 209                         |
| Goodness of fit                                             | 0.995                        | 1.076                        | 1.030                       |
| R <sup>a</sup> (R <sup>b</sup> )                            | 0.0578 (0.1367) <sup>b</sup> | 0.0341(0.0390) <sup>b</sup>  | 0.0375(0.0637) <sup>b</sup> |
| wR <sub>2</sub> <sup>a</sup> (R <sub>2</sub> <sup>b</sup> ) | 0.1396 (0.1774) <sup>b</sup> | 0.0843 (0.0866) <sup>b</sup> | 0.0800(0.0892) <sup>b</sup> |
| $\Delta(\rho)$ (e Å <sup>-3</sup> )                         | 0.31 and -0.52               | 1.15 and -2.00               | 1.27 and -0.90              |

\* a.  $R = \sum |F_o| - |F_c| / \sum |F_o|$ ,  $wR_2 = (\sum (w(F_o^2 - F_c^2)^2) / \sum (w(F_o^2)^2))^{1/2}$ ; b.  $[F_o > 4\sigma(F_o)]$ ; b. based on all data.

**Table S2.** Selected bond lengths (Å) and angles (°) for the co-crystals **1-3**\*

| <b>co-crystal 1</b> |            |                           |           |
|---------------------|------------|---------------------------|-----------|
| C1-C2               | 1.419(3)   | C12-O3                    | 1.212(3)  |
| C1-C3               | 1.409(3)   | C18-N1                    | 1.324(3)  |
| C5-N3               | 1.408(3)   | N2-N3                     | 1.393(3)  |
| C10-O4              | 1.397(3)   | C16-O6                    | 1.217(3)  |
| C3-C1-C2            | 119.0(2)   | O1-C13-C17                | 122.3(2)  |
| O6-C16-N5           | 122.5(2)   | O5-C8-N4                  | 119.8(2)  |
| N4-C8-C4            | 116.0(2)   | C32-C27-C28               | 125.6(13) |
| N2-N3-C12           | 116.48(19) | N1-C18-C20                | 124.0(3)  |
| <b>co-crystal 2</b> |            |                           |           |
| I3-C5               | 2.105(4)   | O3-C9                     | 1.281(5)  |
| I1-C1               | 2.103(4)   | O2-C8                     | 1.310(5)  |
| I2-C3               | 2.094(4)   | C12-C12 <sup>#1</sup>     | 1.497(8)  |
| C11-C10             | 1.388(8)   | C13-C14                   | 1.378(8)  |
| C4-C5-I3            | 118.5(3)   | C13-C12-C12 <sup>#1</sup> | 120.9(6)  |
| C2-C1-I1            | 118.9(3)   | C4-C3-I2                  | 119.4     |
| O6-C7-O5            | 125.4(4)   | C14-N1-C10                | 121.7(5)  |
| <b>co-crystal 3</b> |            |                           |           |
| I1-C4               | 2.091(4)   | I2-C6                     | 2.081(4)  |
| O3-C9               | 1.240(6)   | O4-C9                     | 1.241(5)  |

|               |           |               |          |
|---------------|-----------|---------------|----------|
| N1-C10        | 1.313(8)  | N1-C14        | 1.321(8) |
| C12-C12#1     | 1.475(9)  | C11-C10       | 1.379(8) |
| C5-C6-I2      | 119.7(13) | C1-C6-I2      | 118.8(3) |
| C10-N1-C14    | 120.4(5)  | C13-C12-C12#1 | 122.2(5) |
| C11-C12-C12#1 | 120.3(6)  | N1-C10-C11    | 121.1(6) |
| C3-C4-I1      | 119.7(3)  | O1-C7-C1      | 114.1(4) |

\*co-crystal **2**: #1:  $x+1/2, -y+3/2, z+1/2$ . co-crystal **3**: #1:  $x+1/2, y-1/2, z$ .

**Table S3.** Hydrogen bond lengths (Å) and angles (°) for the co-crystals **1-3**\*

| D-H...A             | d(D-H) | d(H...A) | d(D...A) | <(DHA) |
|---------------------|--------|----------|----------|--------|
| <b>co-crystal 1</b> |        |          |          |        |
| N5-H5...O1#1        | 0.86   | 2.08     | 2.836(3) | 146.8  |
| N2-H2...N1#2        | 0.86   | 2.10     | 2.941(3) | 164.8  |
| C21-H21...N6#3      | 0.93   | 2.50     | 3.399(4) | 162.1  |
| C33-H33B...O2#4     | 0.97   | 2.49     | 3.427(6) | 163.4  |
| C7-H7...O5#5        | 0.93   | 2.57     | 3.199(3) | 125.3  |
| <b>co-crystal 2</b> |        |          |          |        |
| O2-H2...O3#1        | 0.82   | 1.75     | 2.524(4) | 156.4  |
| <b>co-crystal 3</b> |        |          |          |        |
| O5-H5...O4#1        | 0.82   | 1.70     | 2.514(5) | 175.2  |
| C14-H14...O6#2      | 0.93   | 2.36     | 3.288(7) | 174.6  |

\*co-crystal **1**: #1:  $-x+1, -y+2, -z$ ; #2:  $-x+2, y-1/2, -z+1/2$ ; #3:  $-x+1, y+1/2, -z-1/2$ ; #4:  $-x+2, -y+2, -z$ ; #5:  $x, y+1, z$ . co-crystal **2**: #1:  $x+1/2, -y+3/2, z+1/2$ . co-crystal **3**: #1:  $x+1/2, y-1/2, z$ ; #2:  $-x+2, y, -z+1/2$ .



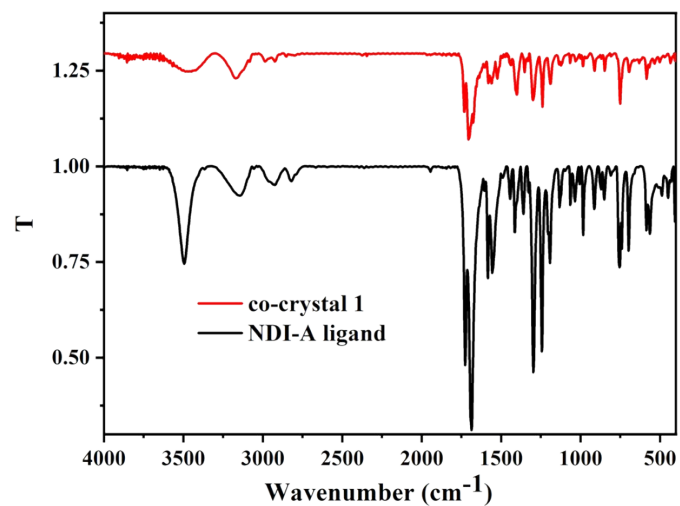

(a)

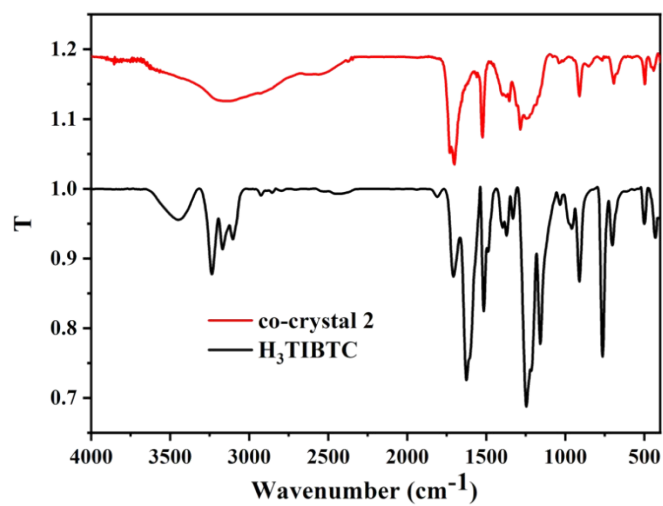

(b)

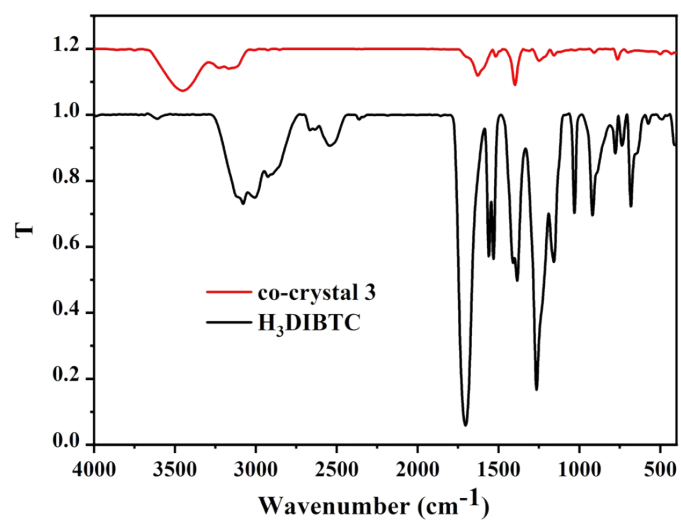

(c)

**Figure S2** The FT-IR spectra of the moieties and the co-crystal 1-3

**Table S4.** Detailed attribution of IR data of the starting compounds and co-crystal **1-3** (cm<sup>-1</sup>)

|                        | NDI-A            | H <sub>3</sub> TIBTC | H <sub>3</sub> DIBTC | co-crystal <b>1</b> | co-crystal <b>2</b> | co-crystal <b>3</b> |
|------------------------|------------------|----------------------|----------------------|---------------------|---------------------|---------------------|
| $\nu_{\text{N-H}}$     | 3496             | -                    | -                    | 3473                | -                   | -                   |
| $\nu_{\text{Ar-H}}$    | 3144             | -                    | 3126                 | 3170                | 3168                | 3104                |
| $\nu_{\text{C=O}}$     | 1687,<br>1413    | 1692,<br>1405        | 1683,<br>1403        | 1703, 1400          | 1616, 1385          | 1627, 1408          |
| $\nu_{\text{C=N}}$     | 1580             | -                    | -                    | 1576                | 1520                | 1521                |
| $\nu_{\text{C=C}}$     | 1306             | 1307                 | 1244                 | 1302                | 1288                | 1247                |
| $\nu_{\text{C-C}}$     | 1237             | 1201                 | 1137                 | 1243                | 1136                | 1153                |
| $\nu_{\text{C-N}}$     | 1189             | -                    | -                    | 1195                | -                   | -                   |
| $\delta_{\text{Ar-H}}$ | 915, 846,<br>758 | -                    | -                    | 921, 852,<br>755    | 960, 910,<br>766    | 905, 858,<br>763    |

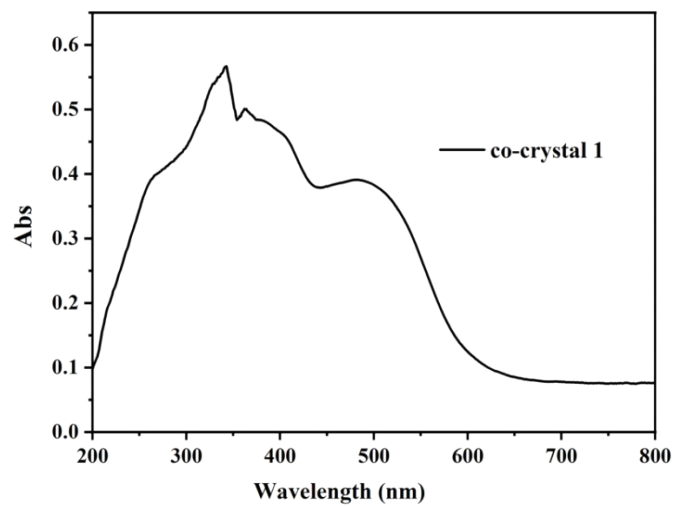

(a)

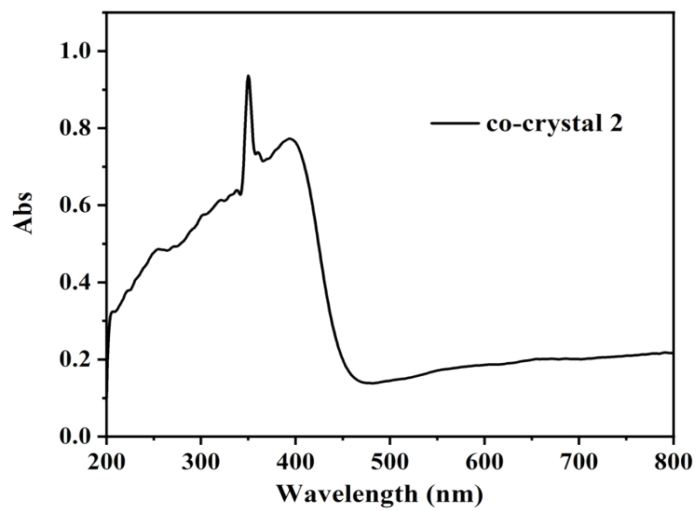

(b)

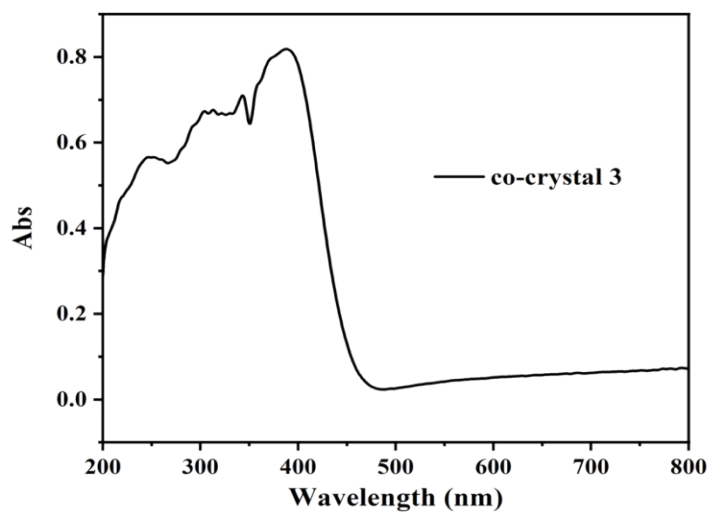

(c)

**Figure S3** The solid UV-Vis spectra of the co-crystal 1-3

**Table S5** UV-vis spectra identifications of co-crystal compounds **1-3**

| co-crystal | LLCT            |            | Intramolecular charge transfer |
|------------|-----------------|------------|--------------------------------|
|            | $\pi$ - $\pi^*$ | n- $\pi^*$ |                                |
| <b>1</b>   | 342             | 362        | 486                            |
| <b>2</b>   | 256             | 315        | 395                            |
| <b>3</b>   | 248             | 307        | 395                            |

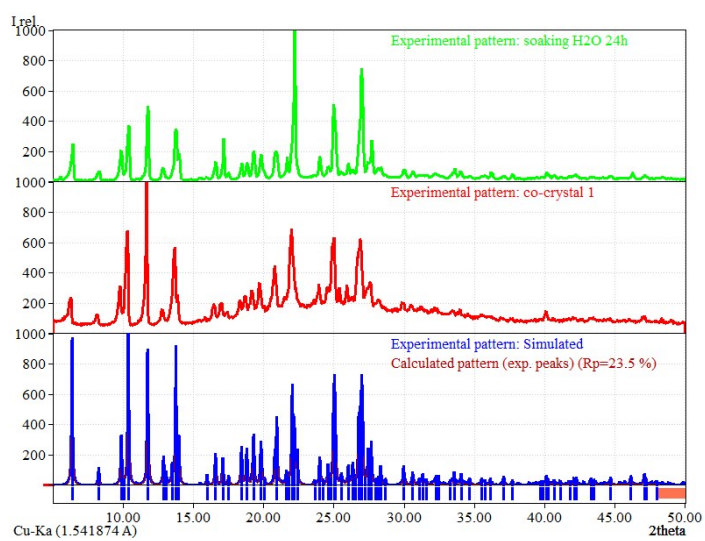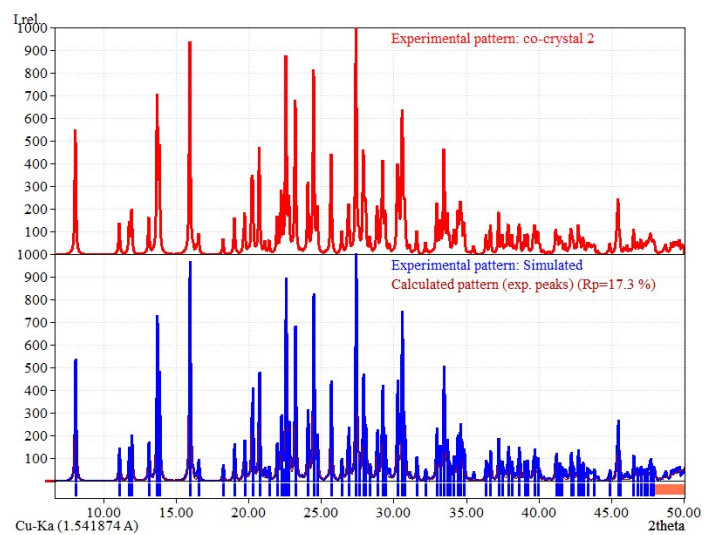

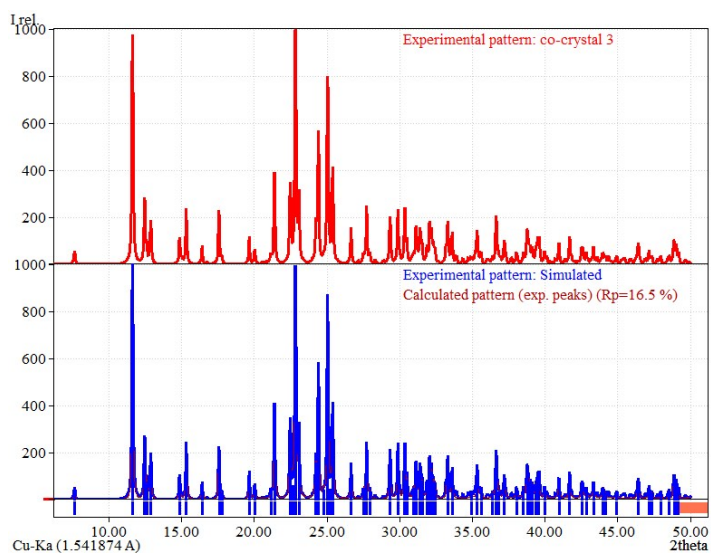

(c)

Figure S4 The PXR D patterns of the co-crystal 1-3

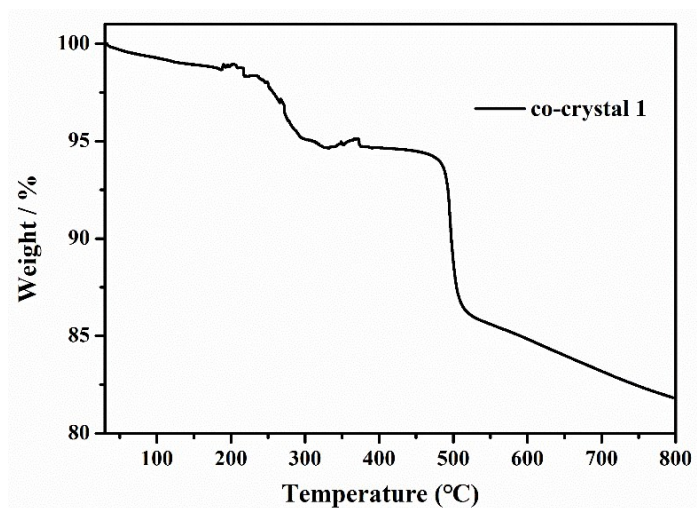

(a)

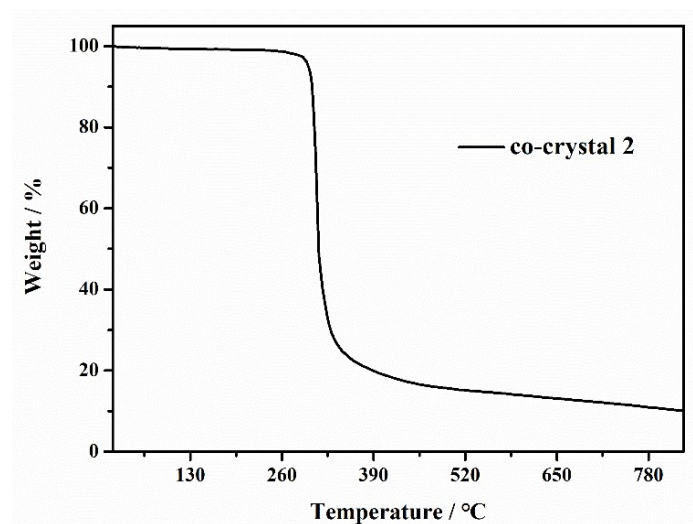

(b)

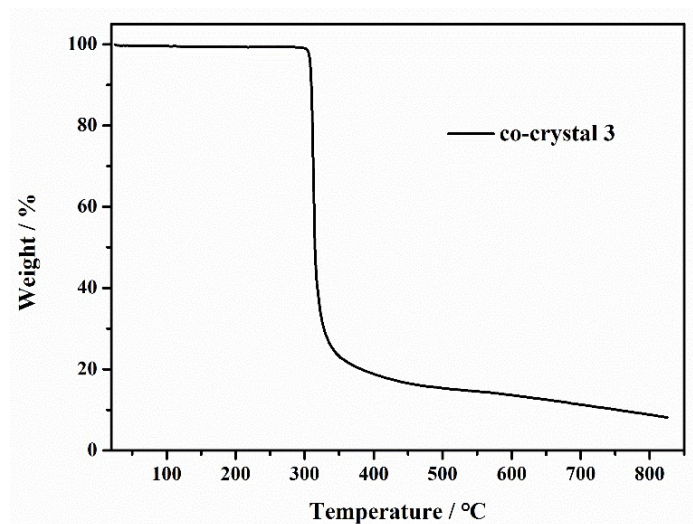

(c)

**Figure S5** The TG curves of the co-crystal 1-3

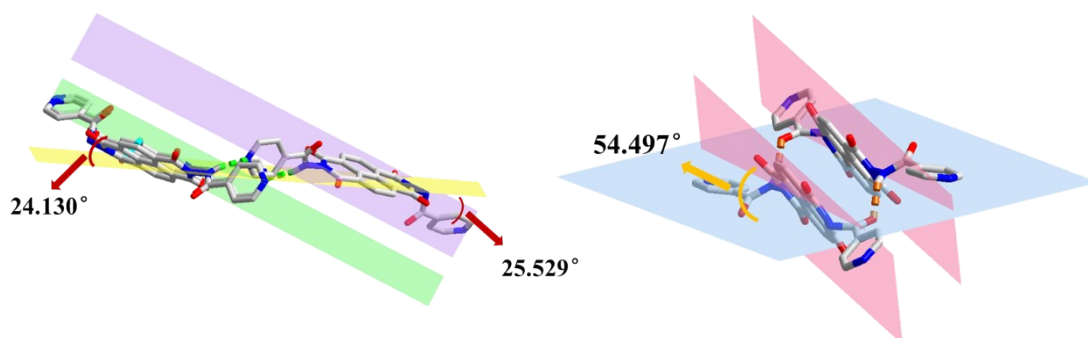

**Figure S6** The angles of the planes of the NDI-A moieties in co-crystal **1** (yellow, blue: the plane constructed by hydrogen bond ring; green, purple, pink: the plane constructed by NDI-A moieties)

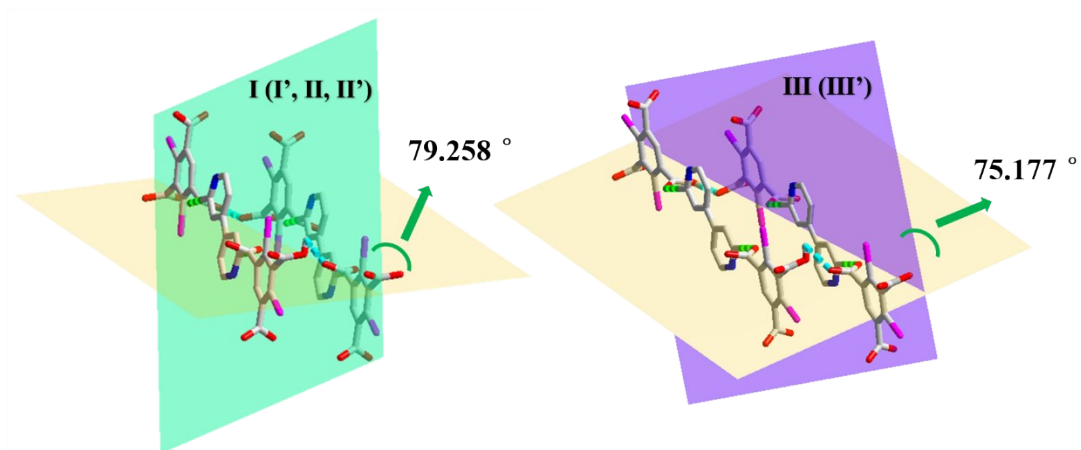

**Figure S7** The angles of the planes of the H<sub>3</sub>DIBTC and 4,4-bipy moieties in co-crystal **3** (yellow: the plane constructed by hydrogen bond ring; green: the I , I ' , II , II ' plane; purple: the III , III ' plane )

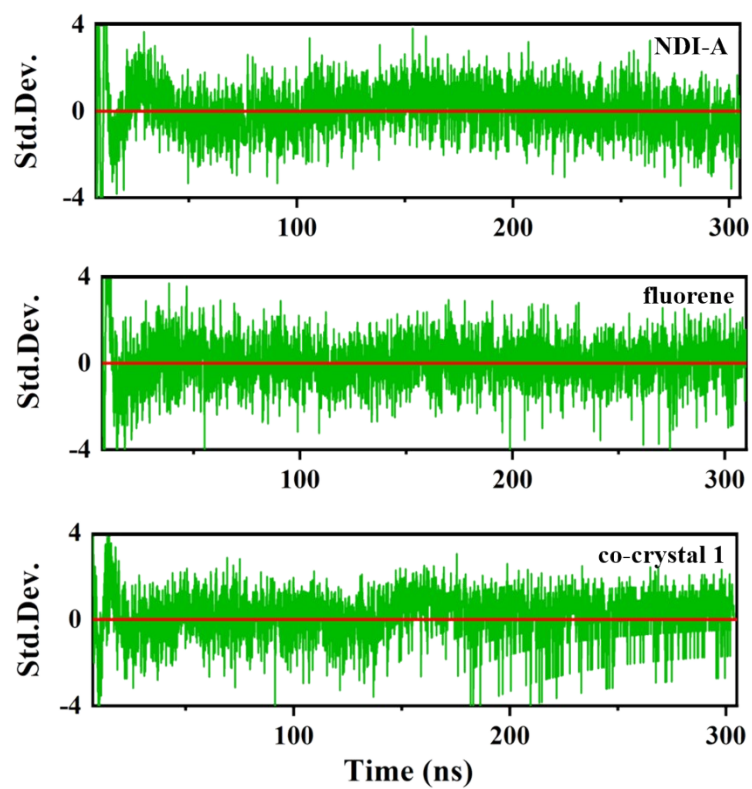

**Figure S8** The residuals of the fits of the luminescence decay traces of NDI-A, fluorene, and co-crystal **1**

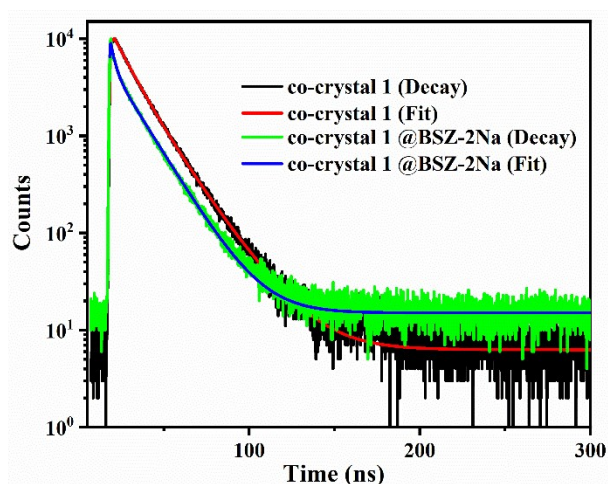

**Figure S9** Comparison of the liquid fluorescence lifetime of co-crystal **1** before and after adding balsalazide disodium

## References

- [1] S. Bhattacharjee, B. Maitia and S. Bhattacharya, *Nanoscale*, 2016, **8**, 11224-11233.
- [2] B. Wang, X. L. Lv, D. W. Feng, L. H. Xie, J. Zhang, M. Li, Y. B. Xie, J. R. Li and H. C. Zhou, *J. Am. Chem. Soc.*, 2016, **138**, 6204–6216.
- [3] C. H. Liu, Q. L. Guan, X. D. Yang, F. Y. Bai, L. X. Sun and Y. H. Xing, *Inorg. Chem.*, 2020, **59**, 8081–8098.
- [4] G. M. Sheldrick, *Acta Crystallogr A.*, 2008, **64**, 112–122.
- [5] G. M. Sheldrick, *University of Göttingen, Göttingen*, 1996.
- [6] G. M. Sheldrick, *University of Göttingen, Göttingen*, 1997.
- [7] O. V. Dolomanov, L. J. Bourhis, R. J. Gildea, J. A. K. Howard and H. Puschmann, *J Appl Crystallogr.*, 2009, **42**, 339-341.
- [8] A.L. Spek, *J Appl Crystallogr.*, 2003, **36**, 7–13.
